# Supplementary material for: Clinical and epidemiological aspects of Delta and Gamma SARS-CoV-2 variant of concern from the western Brazilian Amazon
Source: PubMed Central journal article supplement (PMC9870256; doi:10.1590/0074-02760220155), 2023-01-20
Supplement: 1678-8060-mioc-117-e220155-s.pdf [file 1678-8060-mioc-117-e220155-s.pdf]

We gratefully acknowledge the following authors from the originating laboratories responsible for obtaining the specimens and the submitting laboratories where genetic sequence data were generated and shared via the GISAID Initiative.

TABLE  
Laboratories and institutions that generated and shared gene sequences in the GISAID Initiative used in this study

| Virus name                                        | Accession number | Collected  | Originating lab                                                                                                               | Submitting lab                                                                                                                | Author            |
|---------------------------------------------------|------------------|------------|-------------------------------------------------------------------------------------------------------------------------------|-------------------------------------------------------------------------------------------------------------------------------|-------------------|
| hCoV-19/Wuhan/IPBC AMS-WH-01/2019                 | EPI_ISL_402123   | 2019-12-24 | Institute of Pathogen Biology, Chinese Academy of Medical Sciences & Peking Union Medical College                             | Institute of Pathogen Biology, Chinese Academy of Medical Sciences & Peking Union Medical College                             | Ren et al.        |
| hCoV-19/Brazil/RJ-FIOCRUZ-22118/2021              | EPI_ISL_2443610  | 2021-05-05 | Laboratório de Vírus Respiratórios e Sarampo, Instituto Oswaldo Cruz, Fundação Oswaldo Cruz                                   | Laboratório de Vírus Respiratórios e Sarampo, Instituto Oswaldo Cruz, Fundação Oswaldo Cruz                                   | Resende et al.    |
| hCoV-19/Brazil/BA-FIOCRUZ-31255/2021              | EPI_ISL_2863714  | 2021-06-18 | Laboratório Central de Saúde Pública do Estado da Bahia                                                                       | Laboratório de Vírus Respiratórios e Sarampo, Instituto Oswaldo Cruz, Fundação Oswaldo Cruz                                   | Resende et al.    |
| hCoV-19/Brazil/AM-987/2020                        | EPI_ISL_833167   | 2020-12-16 | DB Diagnósticos do Brasil                                                                                                     | Instituto Adolfo Lutz, Centro Interdisciplinar de Procedimentos, Laboratório Estratégico                                      | Sacchi et al.     |
| hCoV-19/Brazil/AM-FIOCRUZ-21841237MIA/2021        | EPI_ISL_2777487  | 2021-03-04 | Laboratório de Ecologia de Doenças Transmissíveis na Amazônia, Instituto Leônidas e Maria Deane - Fiocruz Amazônia            | Laboratório de Ecologia de Doenças Transmissíveis na Amazônia, Instituto Leônidas e Maria Deane - Fiocruz Amazônia            | Nascimento et al. |
| hCoV-19/Brazil/AM-FIOCRUZ-21140024DEB/2021        | EPI_ISL_2777396  | 2021-01-05 | Laboratório de Ecologia de Doenças Transmissíveis na Amazônia, Instituto Leônidas e Maria Deane - Fiocruz Amazônia            | Laboratório de Ecologia de Doenças Transmissíveis na Amazônia, Instituto Leônidas e Maria Deane - Fiocruz Amazônia            | Nascimento et al. |
| hCoV-19/Brazil/SP-HIAE-ID595/2021                 | EPI_ISL_3505194  | 2021-08-07 | Laboratório de Técnicas Especiais - Hospital Israelita Albert Einstein                                                        | Laboratório de Técnicas Especiais - Hospital Israelita Albert Einstein                                                        | Amgarten et al.   |
| hCoV-19/Brazil/ES-FIOCRUZ-40147/2021              | EPI_ISL_3435042  | 2021-07-16 | Laboratório Central de Saúde Pública do Estado do Espírito Santo                                                              | Laboratório de Vírus Respiratórios e Sarampo, Instituto Oswaldo Cruz, Fundação Oswaldo Cruz                                   | Resende et al.    |
| hCoV-19/Brazil/BA-LACEN-BA252/2021                | EPI_ISL_3255081  | 2021-05-07 | Laboratório Central de Saúde Pública do Estado da Bahia                                                                       | Laboratório Central de Saúde Pública do Estado da Bahia                                                                       | Tosta et al.      |
| hCoV-19/Brazil/AP-FIOCRUZ-40075/2021              | EPI_ISL_3434983  | 2021-06-19 | Laboratório Central de Saúde Pública do Estado do Amapá                                                                       | Laboratório de Vírus Respiratórios e Sarampo, Instituto Oswaldo Cruz, Fundação Oswaldo Cruz                                   | Resende et al.    |
| hCoV-19/Brazil/SP-HIAE-ID372/2021                 | EPI_ISL_3246184  | 2021-07-23 | Laboratório de Técnicas Especiais - Hospital Israelita Albert Einstein                                                        | Laboratório de Técnicas Especiais - Hospital Israelita Albert Einstein                                                        | Amgarten et al.   |
| hCoV-19/Brazil/RJ-LNN03551/2021                   | EPI_ISL_3245250  | 2021-07-14 | Laboratório Central de Saúde Pública Noel Nutels                                                                              | Laboratório de Bioinformática                                                                                                 | Almeida et al.    |
| hCoV-19/Brazil/PE-FIOCRUZ-IAM2275/2021            | EPI_ISL_3046274  | 2021-07-01 | Laboratório Central de Saúde Pública do Estado de Pernambuco                                                                  | Wallau Lab em nome da Fiocruz COVID-19 Rede de Vigilância Genômica                                                            | Paiva et al.      |
| hCoV-19/Brazil/AM-FIOCRUZ-21142276EAX/2021        | EPI_ISL_3050641  | 2021-07-05 | Laboratório de Ecologia de Doenças Transmissíveis na Amazônia, Instituto Leônidas e Maria Deane - Fiocruz Amazônia            | Laboratório de Ecologia de Doenças Transmissíveis na Amazônia, Instituto Leônidas e Maria Deane - Fiocruz Amazônia            | Nascimento et al. |
| hCoV-19/Brazil/SP-IAL-5338/2021                   | EPI_ISL_5863702  | 2021-09-20 | Instituto Adolfo Lutz - Regional de Santo André                                                                               | Instituto Adolfo Lutz, Centro Interdisciplinar de Procedimentos, Laboratório Estratégico                                      | Sacchi et al.     |
| hCoV-19/Brazil/SP-IB_121956/2021                  | EPI_ISL_5651336  | 2021-07-17 | Unidade de Pronto Atendimento Central de Caraguatatuba                                                                        | Instituto Butantan                                                                                                            | Covas et al.      |
| hCoV-19/Brazil/SP-NVBS2934GEN OV827790202793/2021 | EPI_ISL_4424434  | 2021-07-01 | DASA                                                                                                                          | DASA                                                                                                                          | Guarisch et al.   |
| hCoV-19/Brazil/PA-FIOCRUZ-51759/2021              | EPI_ISL_4632928  | 2021-08-19 | Laboratório Central de Saúde Pública do Estado do Pará                                                                        | Laboratório de Vírus Respiratórios e Sarampo, Instituto Oswaldo Cruz, Fundação Oswaldo Cruz                                   | Resende et al.    |
| hCoV-19/Brazil/SP-IB_116441/2021                  | EPI_ISL_5649102  | 2021-06-21 | UBS Dr. Waldomiro Ferreira Neves Serpardo                                                                                     | Instituto Butantan                                                                                                            | Covas et al.      |
| hCoV-19/Brazil/PE-FIOCRUZ-IAM3553/2021            | EPI_ISL_3835266  | 2021-08-02 | Laboratório Central de Saúde Pública do Estado de Pernambuco                                                                  | Wallau Lab em nome da Fiocruz COVID-19 Rede de Vigilância Genômica                                                            | Paiva et al.      |
| hCoV-19/Brazil/AM-FIOCRUZ-ILMD2100596/2021        | EPI_ISL_5490090  | 2021-07-21 | Laboratório Central de Saúde Pública do Amazonas                                                                              | Laboratório de Ecologia de Doenças Transmissíveis na Amazônia, Instituto Leônidas e Maria Deane - Fiocruz Amazônia            | Silva et al.      |
| hCoV-19/Brazil/AM-FIOCRUZ-21891207MSD/2021        | EPI_ISL_4516072  | 2021-08-03 | Laboratório Central de Saúde Pública do Amazonas                                                                              | Laboratório de Ecologia de Doenças Transmissíveis na Amazônia, Instituto Leônidas e Maria Deane - Fiocruz Amazônia            | Nascimento et al. |
| hCoV-19/Brazil/SP-NVBS8005GEN OV828204277055/2021 | EPI_ISL_7366494  | 2021-10-01 | DASA                                                                                                                          | DASA                                                                                                                          | Guarisch et al.   |
| hCoV-19/Brazil/SP-IAL-5363/2021                   | EPI_ISL_5863705  | 2021-09-04 | Instituto Adolfo Lutz - Regional de Campinas                                                                                  | Instituto Adolfo Lutz, Centro Interdisciplinar de Procedimentos, Laboratório Estratégico                                      | Sacchi et al.     |
| hCoV-19/Brazil/SP-HIAE-ID361/2021                 | EPI_ISL_3246173  | 2021-07-23 | Laboratório de Técnicas Especiais - Hospital Israelita Albert Einstein                                                        | Laboratório de Técnicas Especiais - Hospital Israelita Albert Einstein                                                        | Amgarten et al.   |
| hCoV-19/Brazil/SP-IB_103317/2021                  | EPI_ISL_2445049  | 2021-05-10 | Inside diagnósticos sul paulistas                                                                                             | Instituto Butantan                                                                                                            | Covas et al.      |
| hCoV-19/Paraguay/23 1882/2021                     | EPI_ISL_4259569  | 2021-08-18 | Laboratório Central de Salud Pública                                                                                          | Laboratório Central de Salud Pública                                                                                          | Gonzalez et al.   |
| hCoV-19/India/CT-ILSGS01056/20 21                 | EPI_ISL_2341881  | 2021-03-01 | Pt. Jawahar Lal Nehru Memorial Medical College, Raipur                                                                        | Institute of Life Sciences                                                                                                    | Raghav et al.     |
| hCoV-19/Ecuador/NIC-INSP-50257/2021               | EPI_ISL_3274433  | 2021-07-18 | Instituto Nacional de Investigación de Salud Pública - Centro de Referencia Nacional de Influenza y otros Virus Respiratorios | Instituto Nacional de Investigación de Salud Pública - Centro de Referencia Nacional de Influenza y otros Virus Respiratorios | Bruno et al.      |

| Virus name                                         | Accession number | Collected  | Originating lab                                                      | Submitting lab                                                                                                      | Author          |
|----------------------------------------------------|------------------|------------|----------------------------------------------------------------------|---------------------------------------------------------------------------------------------------------------------|-----------------|
| hCoV-19/Brazil/SP-IB_146354/2021                   | EPI_ISL_8721492  | 2021-12-28 | BIOFAST                                                              | Instituto Butantan                                                                                                  | Covas et al.    |
| hCoV-19/Brazil/RJ-LNN07279/2021                    | EPI_ISL_8056949  | 2021-12-01 | Laboratório Central de Saúde Pública Noel Nutels                     | Laboratório de Bioinformática                                                                                       | Almeida et al.  |
| hCoV-19/Brazil/MG-FIOCRUZ-361/2021                 | EPI_ISL_8630314  | 2021-11-19 | Laboratório Municipal de Biologia Molecular                          | Instituto Rene Rachou - Fioacruz Minas                                                                              | Silva et al.    |
| hCoV-19/Brazil/AM-FIOCRUZ-ILMD2200227/2 021        | EPI_ISL_8554924  | 2021-12-28 | Laboratório Central de Saúde Pública do Amazonas                     | Laboratório de Ecologia de Doenças Transmissíveis na Amazônia, Instituto Leônidas e Maria Deane - Fioacruz Amazônia | Silva et al.    |
| hCoV-19/Brazil/SC-NVBS7750GEN OV45616570561/2021   | EPI_ISL_7366560  | 2021-10-04 | DASA                                                                 | DASA                                                                                                                | Guarisch et al. |
| hCoV-19/Brazil/RJ-LNN07342/2021                    | EPI_ISL_8056982  | 2021-11-29 | Laboratório Central de Saúde Pública Noel Nutels                     | Laboratório de Bioinformática                                                                                       | Almeida et al.  |
| hCoV-19/Brazil/ES-FIOCRUZ-65360/2021               | EPI_ISL_8332009  | 2021-10-28 | Laboratório Central de Saúde Pública do Estado do Espírito Santo     | Laboratório de Virus Respiratórios e Sarampo, Instituto Oswaldo Cruz, Fundação Oswaldo Cruz                         | Resende et al.  |
| hCoV-19/Brazil/BA-LACEN-BA954-291993290/2021       | EPI_ISL_8590638  | 2021-12-13 | Laboratório Central de Saúde Pública do Estado da Bahia              | Laboratório Central de Saúde Pública do Estado da Bahia                                                             | Tosta et al.    |
| hCoV-19/Brazil/SP-IB_136559/2021                   | EPI_ISL_5898397  | 2021-10-04 | Inside Diagnósticos                                                  | Instituto Butantan                                                                                                  | Covas et al.    |
| hCoV-19/Brazil/PR-NVBS7226GEN OV8280977377 11/2021 | EPI_ISL_6997471  | 2021-09-09 | DASA                                                                 | DASA                                                                                                                | Guarisch et al. |
| hCoV-19/Brazil/MS-IAL6924/2021                     | EPI_ISL_7565753  | 2021-12-01 | Laboratório Central de Saúde Pública do Estado de Mato Grosso do Sul | Instituto Adolfo Lutz, Centro Interdisciplinar de Procedimentos, Laboratório Estratégico                            | Sacchi et al.   |
| hCoV-19/Brazil/CE-FIOCRUZ-14174/2021               | EPI_ISL_5529874  | 2021-08-12 | Núcleo de Enfrentamento à Covid-19                                   | Laboratório de Epidemiologia Molecular de Competência Analítica - Fundação Oswaldo Cruz Ceará                       | Miyajima et al. |
| hCoV-19/Brazil/SP-IB_143461/2021                   | EPI_ISL_7808931  | 2021-11-28 | Inside                                                               | Instituto Butantan                                                                                                  | Covas et al.    |
| hCoV-19/Brazil/SP-IB_137647/2021                   | EPI_ISL_6508861  | 2021-10-12 | BIOFAST                                                              | Instituto Butantan                                                                                                  | Covas et al.    |
| hCoV-19/Brazil/SC-FIOCRUZ-56924/2021               | EPI_ISL_6173534  | 2021-09-23 | Laboratório Central de Saúde Pública do Estado de Santa Catarina     | Laboratório de Virus Respiratórios e Sarampo, Instituto Oswaldo Cruz, Fundação Oswaldo Cruz                         | Resende et al.  |
| hCoV-19/Brazil/PR-FIOCRUZ-60281/2021               | EPI_ISL_6772699  | 2021-10-26 | Laboratório Central de Saúde Pública do Estado do Paraná             | Laboratório de Virus Respiratórios e Sarampo, Instituto Oswaldo Cruz, Fundação Oswaldo Cruz                         | Resende et al.  |
| hCoV-19/Brazil/SP-IB_146511/2021                   | EPI_ISL_8721946  | 2021-12-28 | BIOFAST                                                              | Instituto Butantan                                                                                                  | Covas et al.    |
| hCoV-19/Brazil/RJ-LNN07165/2021                    | EPI_ISL_7976284  | 2021-11-17 | Laboratório Central de Saúde Pública Noel Nutels                     | Laboratório de Bioinformática                                                                                       | Almeida et al.  |
| hCoV-19/Brazil/BA-LACEN-BA869-291931863/2021       | EPI_ISL_6945670  | 2021-10-20 | Laboratório Central de Saúde Pública do Estado da Bahia              | Laboratório Central de Saúde Pública do Estado da Bahia                                                             | Tosta et al.    |
| hCoV-19/Brazil/SP-IB_128475/2021                   | EPI_ISL_4168674  | 2021-08-23 | UBS Glenda Rodella Dumas                                             | Instituto Butantan                                                                                                  | Covas et al.    |
| hCoV-19/Brazil/SC-FIOCRUZ-54171/2021               | EPI_ISL_5329002  | 2021-09-24 | Laboratório Central de Saúde Pública do Estado de Santa Catarina     | Laboratório de Virus Respiratórios e Sarampo, Instituto Oswaldo Cruz, Fundação Oswaldo Cruz                         | Resende et al.  |
| hCoV-19/Brazil/ES-FIOCRUZ-49165/2021               | EPI_ISL_4220215  | 2021-08-14 | Laboratório Central de Saúde Pública do Estado do Espírito Santo     | Laboratório de Virus Respiratórios e Sarampo, Instituto Oswaldo Cruz, Fundação Oswaldo Cruz                         | Resende et al.  |
| hCoV-19/Brazil/AM-FIOCRUZ-ILMD2100728/2 021        | EPI_ISL_5490895  | 2021-09-20 | Laboratório Central de Saúde Pública do Estado do Amazonas           | Laboratório de Ecologia de Doenças Transmissíveis na Amazônia, Instituto Leônidas e Maria Deane - Fioacruz Amazônia | Silva et al.    |
| hCoV-19/Brazil/SP-IB_135451/2021                   | EPI_ISL_5689173  | 2021-09-28 | BIOFAST                                                              | Instituto Butantan                                                                                                  | Covas et al.    |
| hCoV-19/Brazil/GO-FIOCRUZ-55484/2021               | EPI_ISL_6172815  | 2021-08-31 | Laboratório Central de Saúde Pública do Estado de Goiás              | Laboratório de Virus Respiratórios e Sarampo, Instituto Oswaldo Cruz, Fundação Oswaldo Cruz                         | Resende et al.  |
| hCoV-19/Brazil/BA-LACEN-836-291730739/2021         | EPI_ISL_6692552  | 2021-10-04 | Laboratório Central de Saúde Pública do Estado da Bahia              | Laboratório Central de Saúde Pública do Estado da Bahia                                                             | Tosta et al.    |
| hCoV-19/Brazil/BA-LACEN-BA761-291682183/2021       | EPI_ISL_5146240  | 2021-09-16 | Laboratório Central de Saúde Pública do Estado da Bahia              | Laboratório Central de Saúde Pública do Estado da Bahia                                                             | Tosta et al.    |
| hCoV-19/Brazil/RR-FIOCRUZ-ILMD2200047/2 021        | EPI_ISL_8360720  | 2021-10-04 | Laboratório Central de Saúde Pública do Estado de Roraima            | Laboratório de Ecologia de Doenças Transmissíveis na Amazônia, Instituto Leônidas e Maria Deane - Fioacruz Amazônia | Meneses et al.  |
| hCoV-19/Brazil/AM-FIOCRUZ-ILMD2200241/2 021        | EPI_ISL_8554937  | 2021-12-20 | Laboratório Central de Saúde Pública do Amazonas                     | Laboratório de Ecologia de Doenças Transmissíveis na Amazônia, Instituto Leônidas e Maria Deane - Fioacruz Amazônia | Silva et al.    |
| hCoV-19/Brazil/SP-IB_142457/2021                   | EPI_ISL_7665682  | 2021-11-18 | Laboratório de Franca                                                | Instituto Butantan                                                                                                  | Covas et al.    |
| hCoV-19/Brazil/SC-FIOCRUZ-65179/2021               | EPI_ISL_8266382  | 2021-12-09 | Laboratório Central de Saúde Pública do Estado de Santa Catarina     | Laboratório de Virus Respiratórios e Sarampo, Instituto Oswaldo Cruz, Fundação Oswaldo Cruz                         | Resende et al.  |
| hCoV-19/Brazil/PR-FIOCRUZ-60232/2021               | EPI_ISL_6980543  | 2021-10-21 | Laboratório Central de Saúde Pública do Estado do Paraná             | Laboratório de Virus Respiratórios e Sarampo, Instituto Oswaldo Cruz, Fundação Oswaldo Cruz                         | Resende et al.  |
| hCoV-19/Brazil/AL-IB_139215/2021                   | EPI_ISL_6570066  | 2021-09-22 | Laboratório Central de Saúde Pública do Estado de Alagoas            | Instituto Butantan                                                                                                  | Covas et al.    |
